# Supplementary material for: Quantification of Silicon in Rice Based on an Electrochemical Sensor via an Amplified Electrocatalytic Strategy
Source: MDPI journal article supplement (doi:10.3390/mi12091048), 2021-08-30
Supplement: s1 [file s1]

# Quantification of Silicon in Rice Based on an Electrochemical Sensor via an Amplified Electrocatalytic Strategy

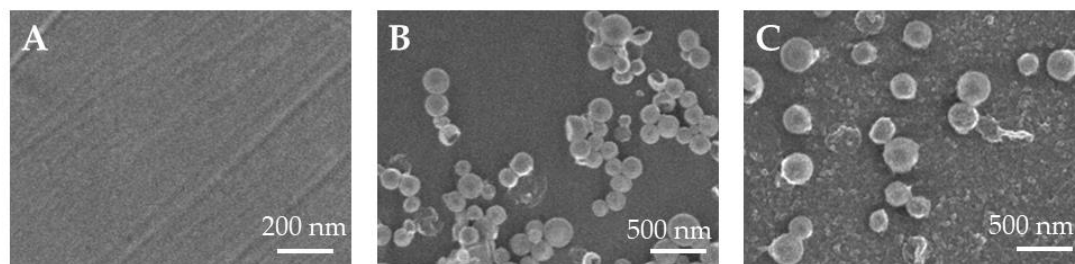

**Figure S1.** SEM images of (A) GCE, (B) Si/GCE and (C) Ag/Si/GCE.
